# Supplementary material for: ATARiS: Computational quantification of gene suppression phenotypes from multisample RNAi screens
Source: HighWire-hosted journal article supplement (doi:10.1101/gr.143586.112), 2012-12-26
Supplement: Supplemental_Figures.pdf [file Supplemental_Figures.pdf]

## Supplementary Figures

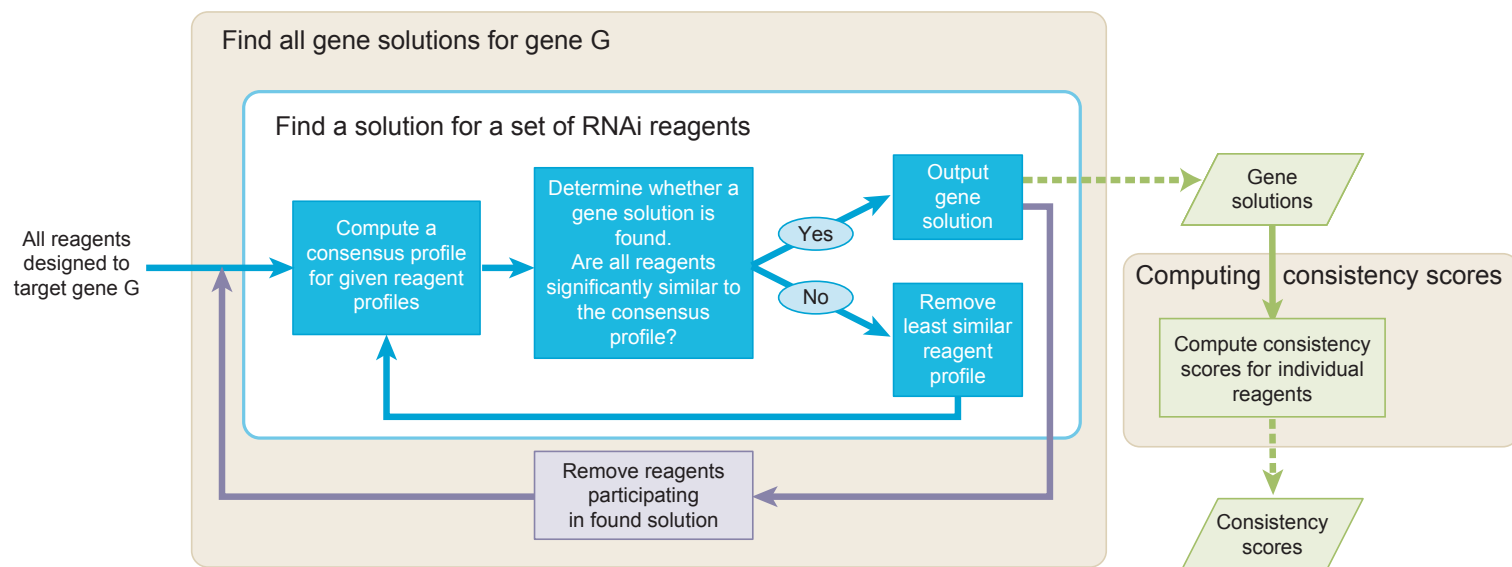

**Supplementary Figure 1. A schematic diagram of the ATARiS algorithm.**

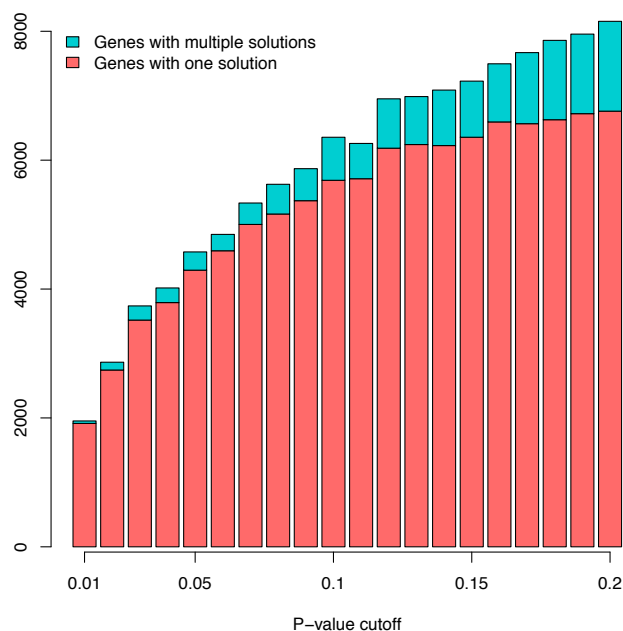

**Supplementary Figure 2. Influence of  $p$ -value cutoff on the number of ATARiS gene solutions.** ATARiS was run on the Achilles dataset using  $p$ -value cutoffs of 0.01, 0.02, ..., 0.20 and the number of genes for which gene solutions were identified is plotted. Each bar represents the median value across 10 ATARiS runs.

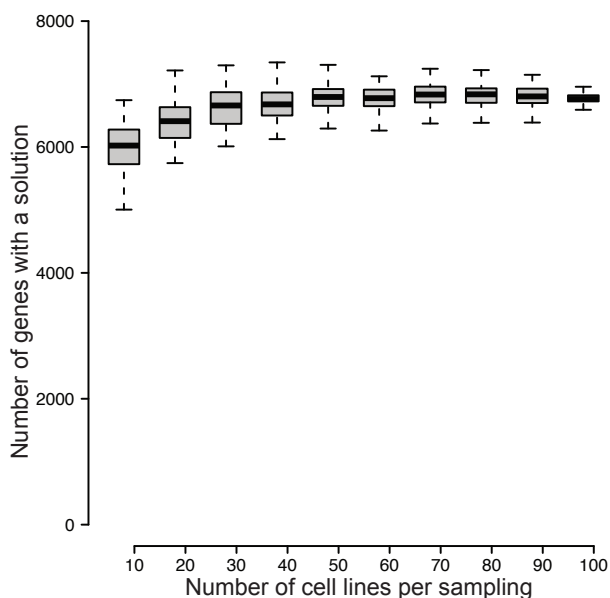

**Supplementary Figure 3. Influence of sample size on the number of ATARiS gene solutions.** We applied ATARiS to one hundred sets of randomly selected samples (out of the total 102 Achilles Project samples) for each of the indicated sample sizes. The distribution of the number of genes with a solution is shown as a box plot for each sample size.

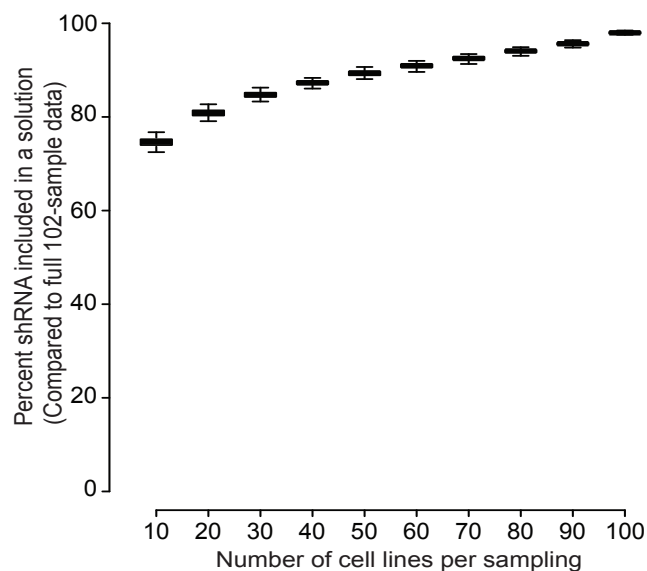

**Supplementary Figure 4. Representation of shRNAs in ATARiS solutions after subsampling from the full 102-sample data.** We applied ATARiS to one hundred sets of randomly selected samples (out of the total 102 Achilles Project samples) for each of the indicated sample sizes. For each run of subsampled data, we calculated the proportion of shRNAs participating in any gene solution identified in the full 102-sample dataset that are included in a gene solution from the run. Results for each subsample size are displayed as a boxplot.

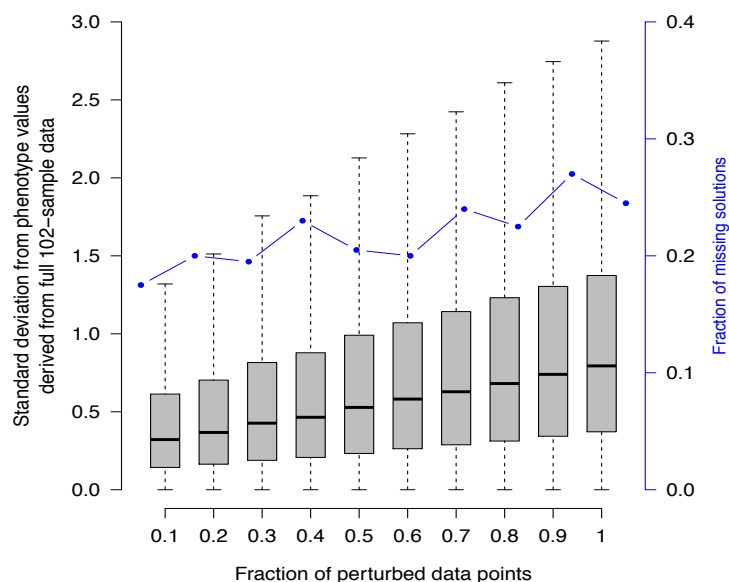

### Supplementary Figure 5. Robustness of ATARiS to noise.

We generated perturbed datasets by adding random noise to varying fractions of the original shRNA measurements in the full Achilles dataset (x axis). We used a Gaussian noise model with mean zero and variance equal to each shRNA's variance. We compared the results of running ATARiS on the perturbed datasets to the ATARiS results on the full 102-sample Achilles dataset. We randomly selected 100 genes for which a solution was identified in the full Achilles dataset. The boxplots depict the differences between phenotype values computed using the perturbed datasets and the full dataset in standard deviation units (i.e. each unit is the standard deviation of that gene phenotype values across all samples when using the full 102-sample dataset). The figure also shows the fraction of genes (out of the 100) for which a solution was not identified in the perturbed datasets. Results were generated using 10 perturbed datasets for each perturbation level.

ATARiS Supplementary Material

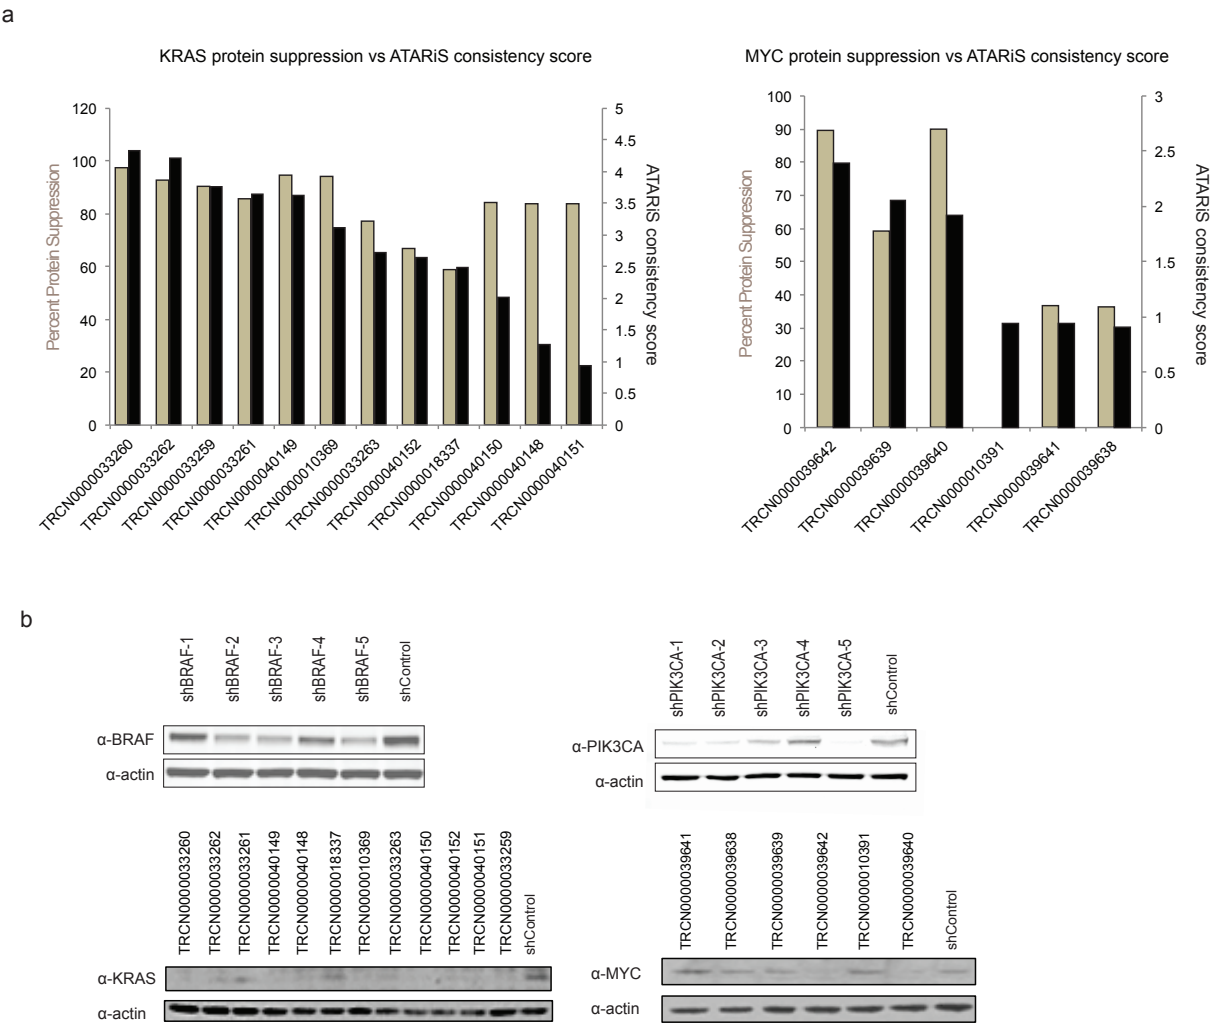

**Supplementary Figure 6. Comparison of shRNA consistency score to protein suppression. (a)** ATARiS consistency scores for individual shRNAs targeting KRAS or MYC are compared to relative protein suppression of the target protein. Immunoblotting was performed in cell line A549 and percent suppression was calculated after quantification of bands by ImageJ software. Colors on axis labels correspond to data bars of the same color. **(b)** Immunoblots used for quantification of protein suppression as shown in manuscript Figure 3 and panel a above.

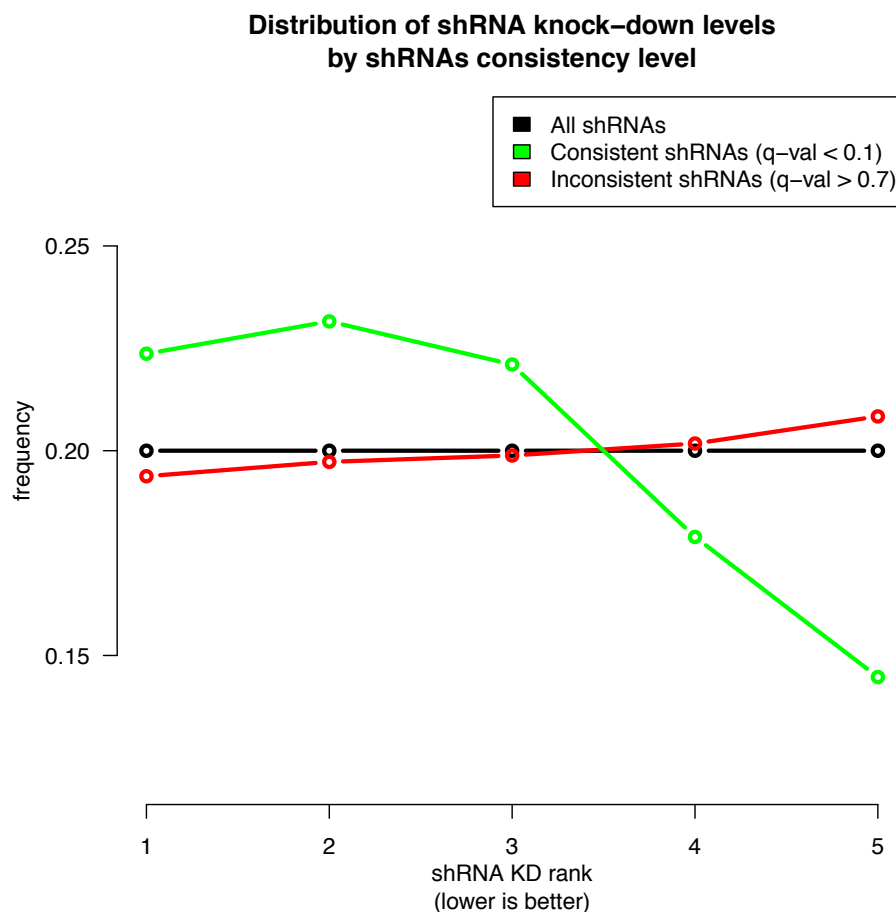

**Supplementary Figure 7. On-target gene suppression measured by high-throughput qRT-PCR is associated with higher consistency scores.** Using high-throughput qRT-PCR data of shRNAs (manuscript in preparation; data available on request) we analyzed screening data for genes with exactly five shRNAs with high confidence qRT-PCR data (n=9,050 shRNAs). For each gene, we ranked the level of mRNA suppression of each of its shRNAs from 1 to 5 (1, most suppressed; 5, least suppressed), and assessed the frequency of each rank for those shRNAs predicted to perform well by ATARiS (consistency score q-value < 0.1). For comparison, we show the frequency of mRNA ranks when using shRNAs that have low consistency scores (consistency score q-values > 0.7), or all shRNA.

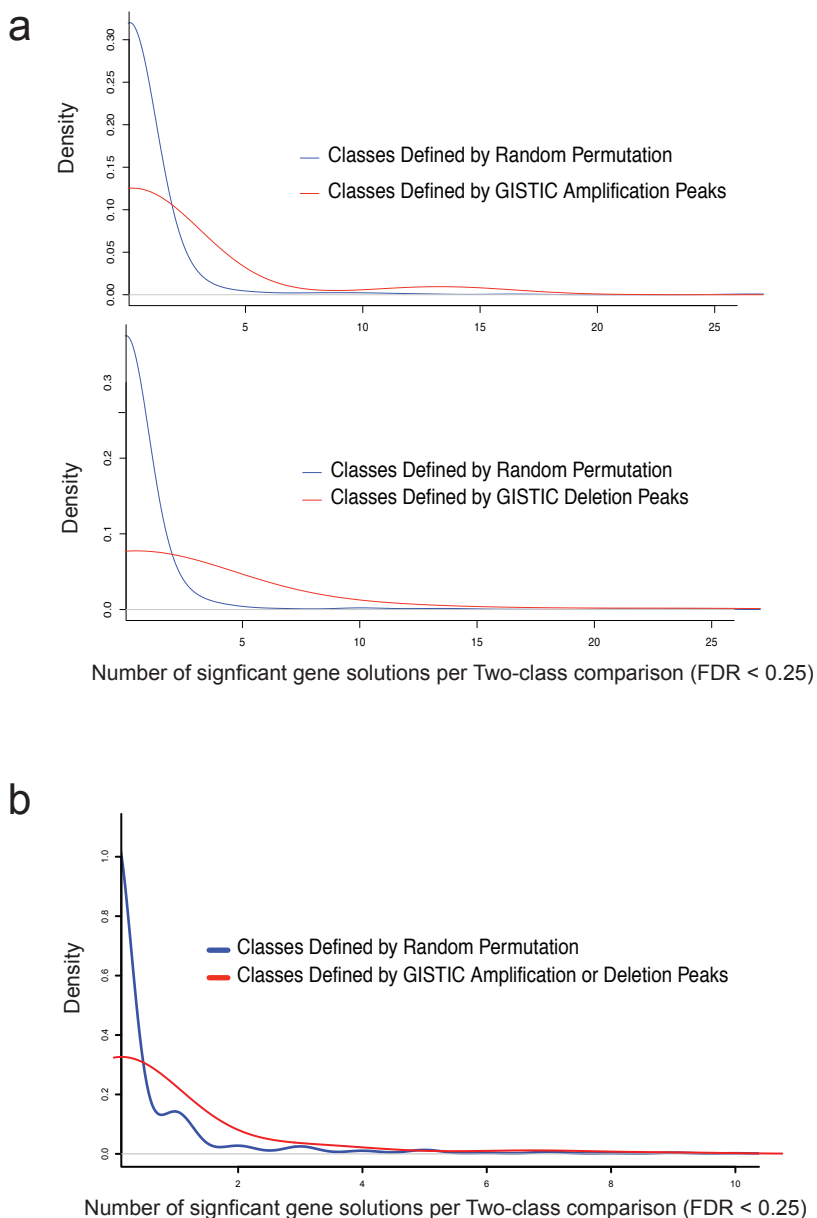

**Supplementary Figure 8. Differentially essential gene solutions from two-class comparisons of significant amplification and deletion peaks.** Peaks were defined by GISTIC analysis across samples from the Cancer Cell Line Encyclopedia (<http://broadinstitute.org/ccle>). To determine genes significantly essential in samples harboring each peak, we calculated the difference in means between two classes determined by the presence or absence of each peak. *P*-values were estimated from an empirical null distribution by permutation of peak assignments. Significant genes were defined as those whose False Discovery Rate (FDR) adjusted *p*-value was less than 0.25. For comparison, we show the distribution of significant genes when assigning random peaks to samples. Random peak assignments were made by permutation of the real peak distribution across samples. (a) Results for amplification peaks (above) or deletion peaks (below) using all gene solutions from the Achilles data. (b) Results for combined amplification and deletion peaks after excluding the first (“primary”) gene solution found for each gene.

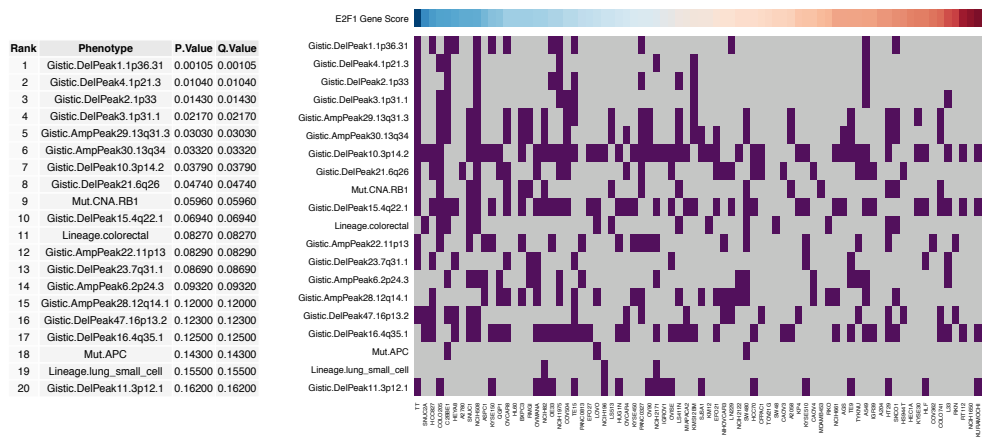

**Supplementary Figure 9. Relationship between genomic features and E2F1 phenotype values.** Using ATARiS phenotype values for *E2F1* (blue – negative; red – positive), we ranked the annotated genomic features (see Methods for annotation of features) for each sample based on the degree to which presence of each feature corresponds to dependency on *E2F1*. Features were ranked by theoretical *p*-value calculated by Mann-Whitney test for ability to discriminate for samples that are highly dependent on *E2F1*. Gistic, peaks defined by GISTIC algorithm. DelPeak, deletion peak. AmpPeak, amplification peak. Mut.CNA, mutation or copy-number loss. Mut, mutation. Purple, presence of indicated feature. Grey, absence of indicated feature.

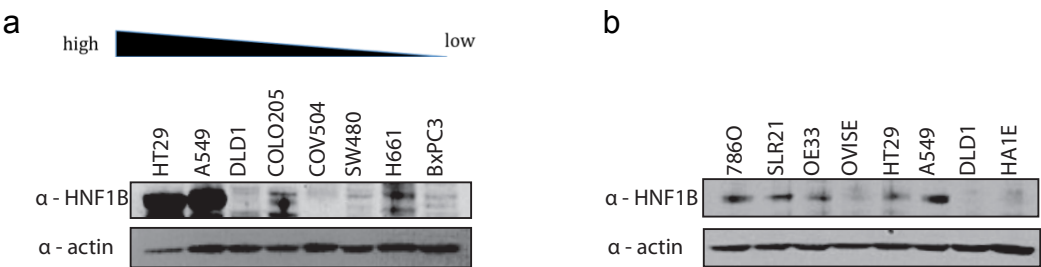

**Supplementary Figure 10. HNF1B protein expression level in cancer cell lines.** Relationship between HNF1B gene phenotype value and expression in a panel of cell lines ordered from high to low dependence (a). Specific cell lines used in Fig. 6c in the manuscript (b).



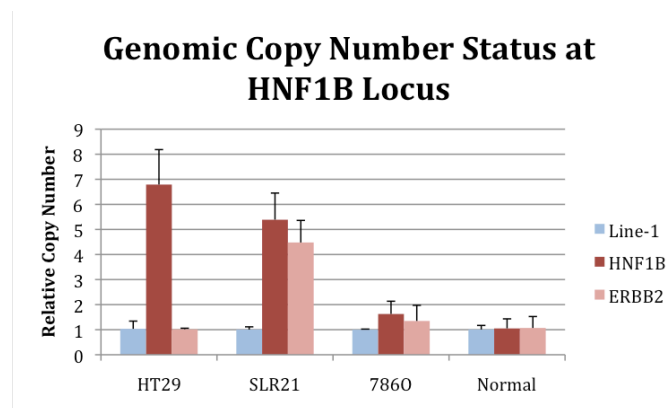

**Supplementary Figure 11.** Genomic copy number status at the HNF1B locus as assessed by quantitative PCR of genomic DNA. HT29 harbored known amplification of HNF1B. SLR21 and 786O had unknown copy number status but were identified as dependent by ATARiS phenotype values and subsequent validation. Error bars, +/- one standard deviation ( $n=3$ ). Primers complementary to Line-1 genomic repetitive elements were used for normalization, and normal human DNA (Applied Biosystems) was used as reference.

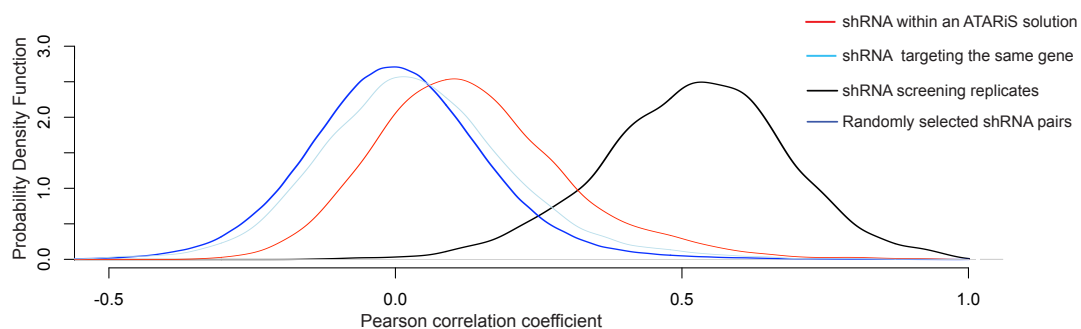

**Supplementary Figure 12. Similarity between effects produced by shRNAs across 102 screened samples.** ShRNAs targeting 500 randomly selected genes were used to calculate Pearson correlation coefficients for screening data between all pairs of shRNA within each indicated set. Density distributions (Probability Density Function) of the correlation coefficients for each set are displayed in the indicated color. As expected, the correlations between shRNA profiles within ATARiS solutions are significantly higher than those between randomly selected pairs of shRNA profiles ( $p$ -value  $< 2.2 \times 10^{-16}$ , Welch's  $t$ -test) and were also significantly higher than the correlations between profiles of shRNAs targeting the same gene ( $p$ -value  $< 2.2 \times 10^{-16}$ , Welch's  $t$ -test), demonstrating that ATARiS identifies shRNAs with consistent effects.

## Supplementary Tables

**Supplementary Table 1. Results for genes calculated from Achilles RNAi dataset.** We account for all genes screened in terms of number of shRNAs used to target that gene and the resulting number of gene solutions identified by ATARiS.

|                                   |   | Number of shRNAs per gene |     |      |      |    |    |    |    |    |    |    |    |    |    |    |    | Totals |
|-----------------------------------|---|---------------------------|-----|------|------|----|----|----|----|----|----|----|----|----|----|----|----|--------|
|                                   |   | 2                         | 3   | 4    | 5    | 6  | 7  | 8  | 9  | 10 | 11 | 12 | 13 | 14 | 15 | 19 | 20 |        |
| Number of gene solutions per gene | 0 | 53                        | 256 | 1041 | 2577 | 12 | 8  | 0  | 3  | 4  | 1  | 0  | 0  | 0  | 0  | 0  | 0  | 3955   |
|                                   | 1 | 24                        | 230 | 1346 | 4549 | 20 | 24 | 14 | 10 | 12 | 2  | 0  | 0  | 1  | 0  | 1  | 0  | 6233   |
|                                   | 2 | 0                         | 0   | 98   | 844  | 5  | 14 | 7  | 9  | 18 | 4  | 3  | 1  | 0  | 2  | 0  | 0  | 1005   |
|                                   | 3 | 0                         | 0   | 0    | 0    | 0  | 0  | 2  | 1  | 5  | 1  | 0  | 0  | 1  | 0  | 0  | 1  | 11     |
|                                   | 4 | 0                         | 0   | 0    | 0    | 0  | 0  | 0  | 0  | 0  | 0  | 1  | 0  | 0  | 0  | 0  | 0  | 1      |
|                                   |   |                           |     |      |      |    |    |    |    |    |    |    |    |    |    |    |    | 11205  |

**Supplementary Table 2. Rank of dependency phenotype value in two-class comparison by mutation Status for common oncogenes.**

| Classes            | Gene          | Rank | P.Val    | Q.Val |
|--------------------|---------------|------|----------|-------|
| KRAS Mutation      | <i>KRAS</i>   | 1    | 2.00E-05 | 0.053 |
| BRAF Mutation      | <i>BRAF</i>   | 1    | 2.00E-05 | 0.158 |
| PI3Kinase Mutation | <i>PIK3CA</i> | 1    | 2.00E-05 | 0.147 |

**Supplementary Table 3. Results for genes calculated from Marcotte *et al.* dataset.** We account for all genes screened in terms of number of shRNAs used to target that gene and the resulting number of gene solutions identified by ATARiS.

|                                   |    | Number of shRNAs per gene |     |     |      |    |    |    |    |    |    |    |    |    |    |    |     | Totals       |
|-----------------------------------|----|---------------------------|-----|-----|------|----|----|----|----|----|----|----|----|----|----|----|-----|--------------|
|                                   |    | 2                         | 3   | 4   | 5    | 6  | 7  | 8  | 9  | 10 | 11 | 12 | 13 | 14 | 15 | 16 | 17+ |              |
| Number of gene solutions per gene | 0  | 34                        | 136 | 986 | 5828 | 11 | 13 | 12 | 6  | 7  | 3  | 0  | 2  | 0  | 2  | 0  | 2   | <b>7042</b>  |
|                                   | 1  | 11                        | 111 | 861 | 5423 | 4  | 19 | 25 | 1  | 7  | 2  | 2  | 2  | 0  | 0  | 0  | 1   | <b>6469</b>  |
|                                   | 2  | 0                         | 0   | 88  | 1752 | 2  | 15 | 17 | 11 | 6  | 0  | 2  | 2  | 0  | 0  | 0  | 5   | <b>1900</b>  |
|                                   | 3  | 0                         | 0   | 0   | 0    | 0  | 1  | 6  | 4  | 3  | 1  | 4  | 2  | 0  | 0  | 0  | 4   | <b>25</b>    |
|                                   | 4  | 0                         | 0   | 0   | 0    | 0  | 0  | 0  | 0  | 0  | 1  | 2  | 0  | 1  | 0  | 1  | 4   | <b>9</b>     |
|                                   | 5+ | 0                         | 0   | 0   | 0    | 0  | 0  | 0  | 0  | 0  | 0  | 1  | 0  | 0  | 0  | 0  | 2   | <b>3</b>     |
|                                   |    |                           |     |     |      |    |    |    |    |    |    |    |    |    |    |    |     | <b>15448</b> |

**Supplementary Table 4. Identities of 83 Project Achilles cell lines for which expression microarrays are available in the Cancer Cell Line Encyclopedia (<http://broadinstitute.org/ccle>).**

|                         |
|-------------------------|
| 786O_KIDNEY             |
| A204_SOFT_TISSUE        |
| A2058_SKIN              |
| A2780_OVARY             |
| A549_LUNG               |
| AGS_STOMACH             |
| ASPC1_PANCREAS          |
| BXPC3_PANCREAS          |
| C2BBE1_LARGE_INTESTINE  |
| CAOV3_OVARY             |
| CAOV4_OVARY             |
| CFPAC1_PANCREAS         |
| COLO205_LARGE_INTESTINE |
| COLO741_SKIN            |
| COV362_OVARY            |
| COV434_OVARY            |
| COV504_OVARY            |
| DLD1_LARGE_INTESTINE    |
| EFO21_OVARY             |
| EFO27_OVARY             |
| GP2D_LARGE_INTESTINE    |
| HCC70_BREAST            |
| HCC827_LUNG             |
| HEC1A_ENDOMETRIUM       |

## ATARiS Supplementary Material

|                                            |
|--------------------------------------------|
| HEYA8_OVARY                                |
| HL60_HAEMATOPOIETIC_AND_LYMPHOID_TISSUE    |
| HLF_LIVER                                  |
| HS944T_SKIN                                |
| HT29_LARGE_INTESTINE                       |
| HUG1N_STOMACH                              |
| HUTU80_SMALL_INTESTINE                     |
| IGR39_SKIN                                 |
| IGROV1_OVARY                               |
| KM12_LARGE_INTESTINE                       |
| KMS12BM_HAEMATOPOIETIC_AND_LYMPHOID_TISSUE |
| KP4_PANCREAS                               |
| KURAMOCHI_OVARY                            |
| KYSE150_OESOPHAGUS                         |
| KYSE30_OESOPHAGUS                          |
| KYSE450_OESOPHAGUS                         |
| KYSE510_OESOPHAGUS                         |
| L33_PANCREAS                               |
| LN229_CENTRAL_NERVOUS_SYSTEM               |
| LOVO_LARGE_INTESTINE                       |
| LS411N_LARGE_INTESTINE                     |
| LS513_LARGE_INTESTINE                      |
| MDAMB453_BREAST                            |
| MIAPACA2_PANCREAS                          |
| NCIH1650_LUNG                              |
| NCIH196_LUNG                               |
| NCIH1975_LUNG                              |
| NCIH2122_LUNG                              |
| NCIH2171_LUNG                              |
| NCIH508_LARGE_INTESTINE                    |
| NCIH661_LUNG                               |
| NCIH82_LUNG                                |
| NIHOVCAR3_OVARY                            |
| OE33_OESOPHAGUS                            |
| OV90_OVARY                                 |
| OVCAR4_OVARY                               |
| OVCAR8_OVARY                               |
| OVISE_OVARY                                |
| OVMANA_OVARY                               |
| PANC0327_PANCREAS                          |
| PANC0813_PANCREAS                          |
| QGP1_PANCREAS                              |
| RKN_OVARY                                  |
| RKO_LARGE_INTESTINE                        |
| RMGI_OVARY                                 |
| RT112_URINARY_TRACT                        |
| SJSA1_BONE                                 |

## ATARiS Supplementary Material

|                               |
|-------------------------------|
| SKC01_LARGE_INTESTINE         |
| SNU840_OVARY                  |
| SNUC1_LARGE_INTESTINE         |
| SNUC2A_LARGE_INTESTINE        |
| SW480_LARGE_INTESTINE         |
| SW48_LARGE_INTESTINE          |
| TE15_OESOPHAGUS               |
| TE9_OESOPHAGUS                |
| TOV21G_OVARY                  |
| TT_OESOPHAGUS                 |
| TYKNU_OVARY                   |
| U251MG_CENTRAL_NERVOUS_SYSTEM |

**Supplementary Table 5. Table of genes that are essential in samples with high expression.** Top 75 results are shown. Known cancer drivers are highlighted in red.

| Rank | ATARiS Solution     | Gene     | Correlation | P-Value  | FDR   |
|------|---------------------|----------|-------------|----------|-------|
| 1    | HNF1B_1_11000       | HNF1B    | -0.553      | 2.00E-05 | 0.075 |
| 1    | PAX8_1_10011        | PAX8     | -0.534      | 2.00E-05 | 0.075 |
| 3    | E2F3_1_11111        | E2F3     | -0.427      | 4.00E-05 | 0.075 |
| 3    | ELF3_1_01001        | ELF3     | -0.434      | 4.00E-05 | 0.075 |
| 5    | SOX10_1_01111       | SOX10    | -0.436      | 6.00E-05 | 0.075 |
| 5    | HIST1H4D_1_0101     | HIST1H4D | -0.422      | 6.00E-05 | 0.075 |
| 7    | NGEF_1_01101        | NGEF     | -0.433      | 8.00E-05 | 0.086 |
| 8    | FERMT1_1_01010      | FERMT1   | -0.398      | 1.00E-04 | 0.094 |
| 9    | BCL2L1_1_11100      | BCL2L1   | -0.373      | 1.40E-04 | 0.096 |
| 9    | ASL_1_11111         | ASL      | -0.399      | 1.40E-04 | 0.096 |
| 11   | POLE3_1_11010       | POLE3    | -0.379      | 1.40E-04 | 0.096 |
| 12   | MYB_1_111111        | MYB      | -0.370      | 3.40E-04 | 0.213 |
| 13   | MPP6_1_0110         | MPP6     | -0.357      | 4.00E-04 | 0.225 |
| 14   | PITX3_1_10111       | PITX3    | -0.370      | 4.20E-04 | 0.225 |
| 15   | HNF4A_1_10101       | HNF4A    | -0.360      | 4.60E-04 | 0.23  |
| 16   | DNAJB8_1_011        | DNAJB8   | -0.362      | 5.00E-04 | 0.23  |
| 17   | PTBP2_1_01001       | PTBP2    | -0.350      | 5.20E-04 | 0.23  |
| 18   | SOX9_1_11011        | SOX9     | -0.346      | 5.80E-04 | 0.242 |
| 19   | ZNF573_1_1011       | ZNF573   | -0.335      | 6.40E-04 | 0.253 |
| 20   | ACTN1_1_0111        | ACTN1    | -0.343      | 9.20E-04 | 0.345 |
| 21   | ZNF695_1_11111      | ZNF695   | -0.337      | 1.06E-03 | 0.369 |
| 22   | TNFSF10_1_11011     | TNFSF10  | -0.340      | 1.08E-03 | 0.369 |
| 23   | PDE3A_1_11111       | PDE3A    | -0.326      | 1.14E-03 | 0.372 |
| 24   | FUBP1_2_11001       | FUBP1    | -0.342      | 1.20E-03 | 0.372 |
| 25   | PNLDC1_1_11000      | PNLDC1   | -0.348      | 1.24E-03 | 0.372 |
| 26   | ODZ1_1_11110        | ODZ1     | -0.328      | 1.34E-03 | 0.384 |
| 27   | CHI3L2_1_11000      | CHI3L2   | -0.307      | 1.38E-03 | 0.384 |
| 28   | NRG2_1_01010        | NRG2     | -0.311      | 1.44E-03 | 0.386 |
| 29   | POMGNT1_1_01111     | POMGNT1  | -0.323      | 1.56E-03 | 0.393 |
| 30   | ADNP2_1_00011       | ADNP2    | -0.317      | 1.62E-03 | 0.393 |
| 31   | TRADD_1_0111        | TRADD    | -0.314      | 1.64E-03 | 0.393 |
| 32   | HDAC4_1_11100       | HDAC4    | -0.326      | 1.72E-03 | 0.393 |
| 33   | RBM47_1_10010       | RBM47    | -0.316      | 1.74E-03 | 0.393 |
| 34   | MAPT_1_111          | MAPT     | -0.333      | 1.78E-03 | 0.393 |
| 35   | HOXA9_1_0111        | HOXA9    | -0.312      | 1.90E-03 | 0.401 |
| 36   | KIAA0430_1_10100    | KIAA0430 | -0.313      | 1.92E-03 | 0.401 |
| 37   | AGPAT3_1_0110       | AGPAT3   | -0.307      | 2.12E-03 | 0.417 |
| 38   | E4F1_1_11110        | E4F1     | -0.308      | 2.18E-03 | 0.417 |
| 39   | KRAS_1_001111101011 | KRAS     | -0.336      | 2.26E-03 | 0.417 |
| 40   | CCNE1_1_0111        | CCNE1    | -0.310      | 2.30E-03 | 0.417 |
| 41   | KPNA5_1_11111       | KPNA5    | -0.308      | 2.48E-03 | 0.417 |
| 42   | TEAD1_1_10110       | TEAD1    | -0.293      | 2.50E-03 | 0.417 |
| 43   | FLNB_1_00111        | FLNB     | -0.299      | 2.58E-03 | 0.417 |
| 43   | FGFR1OP_1_1101      | FGFR1OP  | -0.298      | 2.58E-03 | 0.417 |
| 45   | WWTR1_1_11111       | WWTR1    | -0.307      | 2.62E-03 | 0.417 |
| 46   | ADAM21_1_11110      | ADAM21   | -0.306      | 2.64E-03 | 0.417 |
| 47   | GPR22_1_10110       | GPR22    | -0.305      | 2.72E-03 | 0.417 |
| 47   | PLXDC2_1_11111      | PLXDC2   | -0.305      | 2.72E-03 | 0.417 |

# ATARiS Supplementary Material

|    |                   |         |        |          |       |
|----|-------------------|---------|--------|----------|-------|
| 47 | LMNB2_1_0111      | LMNB2   | -0.300 | 2.72E-03 | 0.417 |
| 50 | CTNNB1_1_0110     | CTNNB1  | -0.313 | 3.04E-03 | 0.451 |
| 51 | FOXD2_1_0101      | FOXD2   | -0.307 | 3.08E-03 | 0.451 |
| 52 | RALGPS2_1_10110   | RALGPS2 | -0.300 | 3.14E-03 | 0.451 |
| 53 | STK31_1_10001     | STK31   | -0.310 | 3.18E-03 | 0.451 |
| 54 | CHML_1_1110       | CHML    | -0.292 | 3.40E-03 | 0.463 |
| 55 | SLC29A3_1_01110   | SLC29A3 | -0.303 | 3.50E-03 | 0.463 |
| 56 | GYS2_1_11110      | GYS2    | -0.293 | 3.52E-03 | 0.463 |
| 57 | GBE1_1_0111       | GBE1    | -0.289 | 3.66E-03 | 0.463 |
| 58 | ITGAV_1_110       | ITGAV   | -0.284 | 3.78E-03 | 0.463 |
| 59 | CHST2_1_11111     | CHST2   | -0.285 | 3.84E-03 | 0.463 |
| 60 | ELOVL4_1_01001    | ELOVL4  | -0.302 | 3.88E-03 | 0.463 |
| 61 | CMKLR1_2_11000    | CMKLR1  | -0.287 | 3.94E-03 | 0.463 |
| 62 | SAMD4B_1_11111    | SAMD4B  | -0.295 | 3.96E-03 | 0.463 |
| 63 | HMOX2_1_1011      | HMOX2   | -0.291 | 3.98E-03 | 0.463 |
| 64 | MICB_1_01111      | MICB    | -0.293 | 4.04E-03 | 0.463 |
| 65 | CCNB1_1_10111     | CCNB1   | -0.286 | 4.16E-03 | 0.463 |
| 66 | KCNH4_1_10111     | KCNH4   | -0.292 | 4.18E-03 | 0.463 |
| 66 | HS3ST5_1_10110    | HS3ST5  | -0.297 | 4.18E-03 | 0.463 |
| 68 | LGALS13_1_1111    | LGALS13 | -0.295 | 4.32E-03 | 0.463 |
| 69 | PTGFR_1_11001     | PTGFR   | -0.285 | 4.38E-03 | 0.463 |
| 70 | NDOR1_1_01001     | NDOR1   | -0.289 | 4.42E-03 | 0.463 |
| 71 | WT1_1_10001111000 | WT1     | -0.296 | 4.44E-03 | 0.463 |
| 71 | TMUB1_1_11010     | TMUB1   | -0.286 | 4.44E-03 | 0.463 |
| 73 | IRX1_1_11111      | IRX1    | -0.268 | 4.52E-03 | 0.465 |
| 74 | ADARB1_1_01111    | ADARB1  | -0.282 | 4.68E-03 | 0.475 |
| 75 | KLF16_1_11111     | KLF16   | -0.277 | 5.00E-03 | 0.497 |

# ATARiS Supplementary Material

**Supplementary Table 6. Table of genes that are essential in samples with focal gene amplification.** Top 25 results are shown. Known cancer drivers are highlighted in red.

| Rank | ATARiS Solution   | Gene    | Mean Difference | P-Value  | FDR   |
|------|-------------------|---------|-----------------|----------|-------|
| 1    | HNF1B_1_11000     | HNF1B   | -2.81           | 1.20E-04 | 0.300 |
| 2    | OR2T2_1_1001      | OR2T2   | -1.42           | 9.00E-04 | 0.700 |
| 3    | E2F3_1_11111      | E2F3    | -1.14           | 1.22E-03 | 0.700 |
| 4    | SRI_1_01011       | SRI     | -0.94           | 1.40E-03 | 0.700 |
| 5    | GSK3B_1_001111011 | GSK3B   | -1.34           | 1.66E-03 | 0.700 |
| 6    | ZAP70_1_11101     | ZAP70   | -0.83           | 1.80E-03 | 0.700 |
| 7    | HOXC13_1_11111    | HOXC13  | -0.83           | 2.22E-03 | 0.700 |
| 8    | PAX8_1_10011      | PAX8    | -1.07           | 2.42E-03 | 0.700 |
| 9    | SLC35B3_1_01111   | SLC35B3 | -1.08           | 2.52E-03 | 0.700 |
| 10   | GH1_1_11011       | GH1     | -0.89           | 3.44E-03 | 0.733 |
| 11   | CACNG7_1_1111     | CACNG7  | -1.02           | 3.68E-03 | 0.733 |
| 12   | JUN_1_111110      | JUN     | -0.86           | 3.88E-03 | 0.733 |
| 13   | SELL_1_01111      | SELL    | -1.61           | 4.12E-03 | 0.733 |
| 14   | AK5_1_01101       | AK5     | -1.14           | 4.18E-03 | 0.733 |
| 15   | RPS6KC1_1_11101   | RPS6KC1 | -0.83           | 4.40E-03 | 0.733 |
| 16   | TFAP2B_1_1111     | TFAP2B  | -0.97           | 5.32E-03 | 0.742 |
| 17   | GLI1_1_10101      | GLI1    | -1.09           | 5.44E-03 | 0.742 |
| 18   | TNNI3K_1_11101    | TNNI3K  | -1.20           | 6.04E-03 | 0.742 |
| 19   | HECTD1_1_01001    | HECTD1  | -0.93           | 6.12E-03 | 0.742 |
| 20   | RALGPS2_1_10110   | RALGPS2 | -1.54           | 7.08E-03 | 0.742 |
| 21   | NFE2_1_01101      | NFE2    | -1.20           | 7.30E-03 | 0.742 |
| 22   | GMFG_1_1110       | GMFG    | -1.37           | 7.38E-03 | 0.742 |
| 23   | PRTFDC1_1_11110   | PRTFDC1 | -1.20           | 7.54E-03 | 0.742 |
| 24   | NR1I2_1_11111     | NR1I2   | -1.04           | 7.58E-03 | 0.742 |
| 25   | SP7_1_11110       | SP7     | -0.54           | 7.92E-03 | 0.742 |



**Supplementary Table 7. Identities of shRNA reagents used.**

| shRNA      | TRC Identifier | NM number             | Target (5'-3')          |
|------------|----------------|-----------------------|-------------------------|
| shKRAS-1   | TRCN0000033263 | NM_033360.2-269s1c1   | GACGAATATGATCCAACAATA   |
| shKRAS-2   | TRCN0000033260 | NM_033360.2-407s1c1   | GAGGGCTTTCTTTGTGTATTT   |
| shKRAS     | TRCN0000033262 | NM_033360.2-509s1c1   | CCTATGGTCCTAGTAGGAAAT   |
| shKRAS     | TRCN0000033261 | NM_033360.2-667s1c1   | GATCCGACAATACAGATTGAA   |
| shKRAS     | TRCN0000040149 | NM_004985.3-641s1c1   | GATGCCTTCTATACATTAGTT   |
| shKRAS     | TRCN0000040148 | NM_004985.3-389s1c1   | CCTCGTTTCTACACAGAGAAA   |
| shKRAS     | TRCN0000018337 | NM_004985.x-204s1c1   | TAGTTGGAGCTGGTGGCGTAG   |
| shKRAS     | TRCN0000010369 | NM_004985.x-1160s1c1  | CAGTTGAGACCTTCTAATTGG   |
| shKRAS     | TRCN0000040150 | NM_004985.3-570s1c1   | CTCAGGACTTAGCAAGAAGTT   |
| shKRAS     | TRCN0000040152 | NM_004985.3-492s1c1   | AGGACTCTGAAGATGTACCTA   |
| shKRAS     | TRCN0000040151 | NM_004985.3-297s1c1   | CTACAGGAAGCAAGTAGTAA    |
| shKRAS     | TRCN0000033259 | NM_033360.2-4328s1c1  | GCAGACGTATATTGTATCATT   |
| shBRAF-1   | TRCN0000006293 | NM_004333.2-304s1c1   | CTATGAAGAATACACCAGCAA   |
| shBRAF-2   | TRCN0000006292 | NM_004333.2-1538s1c1  | CAGCAGTTACAAGCCTTCAAA   |
| shBRAF-3   | TRCN0000006291 | NM_004333.2-2267s1c1  | GCTGGTTTCCAAACAGAGGAT   |
| shBRAF-4   | TRCN0000006290 | NM_004333.2-838s1c1   | CCGCTGTCAAACATGTGGTTA   |
| shBRAF-5   | TRCN0000006289 | NM_004333.2-1106s1c1  | GCAGATGAAGATCATCGAAAT   |
| shPIK3CA-1 | TRCN0000010407 | NM_006218.x-3234s1c1  | AATGAAAGCTCACTCTGGATT   |
| shPIK3CA-2 | TRCN0000039607 | NM_006218.1-2145s1c1  | GCTCATTAACCTTAAC TGACAT |
| shPIK3CA*  | TRCN0000039603 | NM_006218.1-3251s1c1  | GATTCCACACTGCACTGTAA    |
| shPIK3CA-3 | TRCN0000039604 | NM_006218.1-2368s1c1* | CCAGACATCATGTCAGAGTTA   |
| shPIK3CA-4 | TRCN0000039606 | NM_006218.1-924s1c1   | GCCATCTTATTCCAGACGCAT   |
| shPIK3CA-5 | TRCN0000039605 | NM_006218.1-1057s1c1  | CGAGACATTGACAAGATTTAT   |
| shMYC      | TRCN0000010391 | NM_002467.x-1970s1c1  | CAACCTTGGCTGAGTCTTGAG   |
| shMYC      | TRCN0000039638 | NM_002467.2-1828s1c1  | CCATAATGTAAACTGCCTCAA   |
| shMYC      | TRCN0000039639 | NM_002467.2-1552s1c1  | CCCAAGGTAGTTATCCTTAAA   |
| shMYC      | TRCN0000039642 | NM_002467.2-1377s1c1  | CCTGAGACAGATCAGCAACAA   |
| shMYC      | TRCN0000039641 | NM_002467.2-408s1c1   | CAGGAACTATGACCTCGACTA   |
| shMYC      | TRCN0000039640 | NM_002467.2-1657s1c1  | AATGTCAAGAGGCGAACACA    |
| shHNF1B-1  | TRCN0000017508 | NM_000458.1-2162s1c1  | CCGTACTGTCTATGTTGTGAT   |
| shHNF1B-2  | TRCN0000017509 | NM_000458.1-734s1c1   | CCGACAATTCAACCAGACAGT   |
| shHNF1B-3  | TRCN0000017510 | NM_000458.1-751s1c1   | GCAAATCTTGTACCAGGCCTA   |
| shHNF1B-4  | TRCN0000017511 | NM_000458.1-800s1c1   | CCGACAATTCAACCAGACAGT   |
| shHNF1B-5  | TRCN0000017512 | NM_000458.1-923s1c    | CAGTCCAGAGTTCTGGAAATA   |
| shGFP      | TRCN0000072181 | clonetechGfp_437s1c1  | ACAACAGCCACAACGTCTATA   |
| shLacZ     | TRCN0000072231 | lacZ_1650s1c1         | CGCTAAATACTGGCAGGCGTT   |

\*No data. Virus obtained from the RNAi platform for this shRNA could not infect cells.

## Supplementary Methods

### Analysis for amplified and essential genes

To derive gene level copy number from the segmented marker data, we used hg-18 to determine gene footprint for available cell lines in the Cell Line Encyclopedia (CCLE; <http://broadinstitute.org/ccle>), and assigned the minimum marker value as the gene level copy number. The observed pattern of copy number alterations across the genome is analyzed into underlying copy number events using ziggurat deconstruction (Mermel et al. 2011), a maximum likelihood algorithm that uses an empirical probabilistic model of copy number events based on their length and amplitude. Events are then categorized as "broad" or "focal" based on their length relative to their respective chromosome arm, with broad events defined as having arm-relative length greater than 0.95. As broad events are less likely to be related to oncogenic potential of a particular gene (Beroukhi et al. 2010), only focal events were used for further analysis. We considered log2 copy ratio of over 0.3 to be focally amplified. For each gene with at least 6 focally amplified samples in the Achilles RNAi dataset, mean difference of the corresponding gene's ATARiS phenotype values between amplified and non-amplified samples was calculated. We looked for genes that had preferentially lower phenotype values in the context of amplification, and estimated *p*-values from an empirically-derived null distribution by permuting sample labels.

## References

- Beroukhi R, Mermel CH, Porter D, Wei G, Raychaudhuri S, Donovan J, Barretina J, Boehm JS, Dobson J, Urashima M, et al. 2010. The landscape of somatic copy-number alteration across human cancers. *Nature* **463**: 899–905.
- Mermel CH, Schumacher SE, Hill B, Meyerson ML, Beroukhi R, and Getz G. 2011. GISTIC2.0 facilitates sensitive and confident localization of the targets of focal somatic copy-number alteration in human cancers. *Genome Biology* **12**: R41.
